# Supplementary material
Source: Springer Nature journal article supplement (https://www.springermedizin.de/resource/supplementary/13000_2013_825_MOESM3_ESM.pdf/9625176)

A

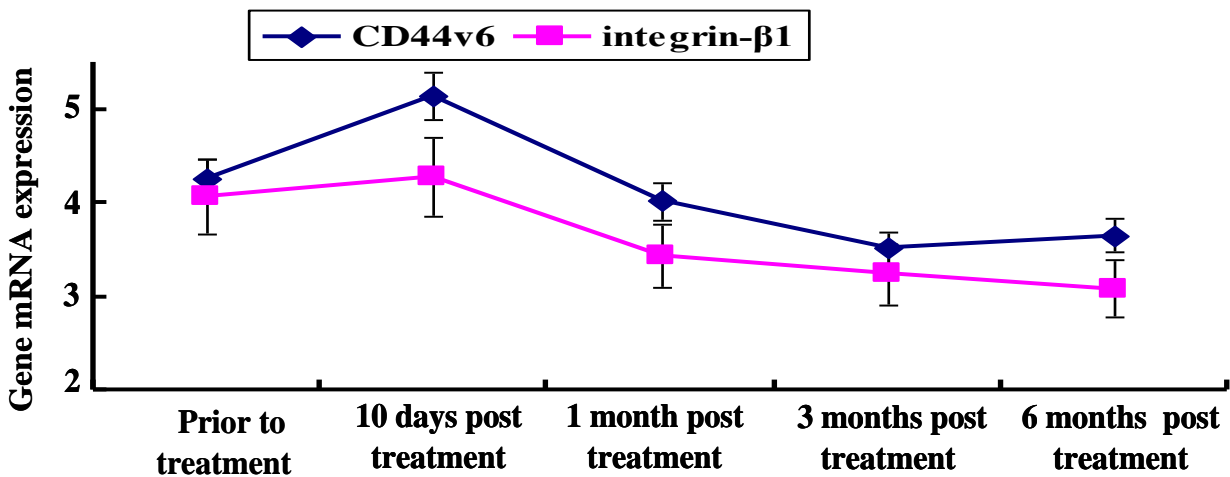

B

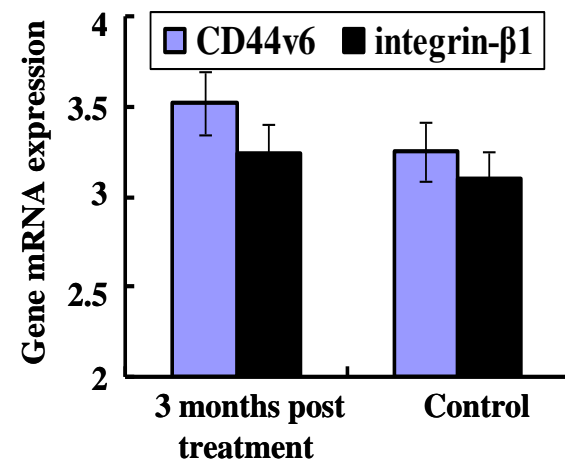

C

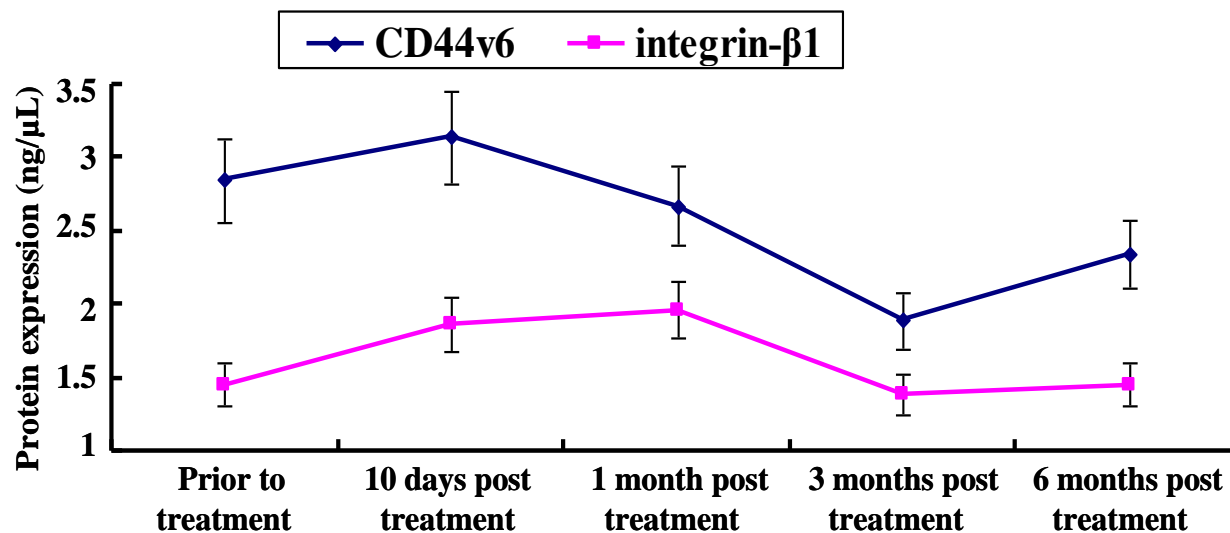

D

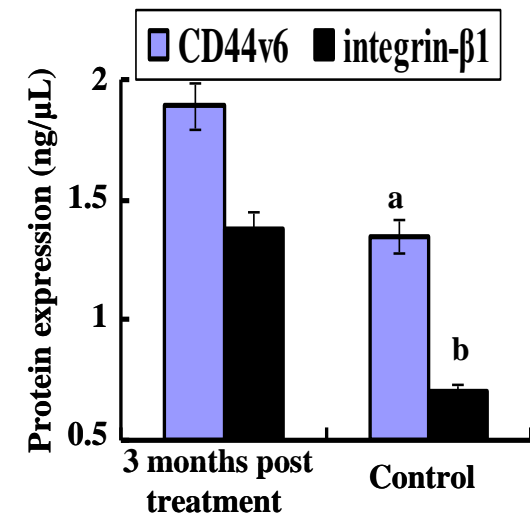

Supplement: MOESM3 [file 9625176]
